# Supplementary material for: Metabolic Profiling of Type 2 Diabetes Patients after Bariatric Surgery by Raman Spectroscopy
Source: MDPI journal article supplement (doi:10.3390/app112210710), 2021-11-12
Supplement: s1 [file s1]

# Metabolic profiling of Type 2 Diabetes patients after bariatric surgery by Raman spectroscopy

Arianna Bonizzi <sup>1</sup>, Marta Sevieri <sup>1</sup>, Leopoldo Sitia <sup>1</sup>, Diego Foschi <sup>1</sup>, Andrea Rizzi <sup>2</sup>, Lorenzo Conti <sup>2</sup>, Fabio Corsi <sup>1,3</sup>, Carlo Morasso <sup>3,\*</sup> and Serena Mazzucchelli <sup>1,\*</sup>

<sup>1</sup> Dipartimento di Scienze Biomediche e cliniche “L. Sacco”, Università di Milano, Milano, 20157, Italy; [arianna.bonizzi@unimi.it](mailto:arianna.bonizzi@unimi.it); [marta.sevieri@unimi.it](mailto:marta.sevieri@unimi.it); [leopoldo.sitia@unimi.it](mailto:leopoldo.sitia@unimi.it); [diego.foschi@unimi.it](mailto:diego.foschi@unimi.it); [fabio.corsi@unimi.it](mailto:fabio.corsi@unimi.it)

<sup>2</sup> S.C. CHIRURGIA GENERALE TRADATE, Ospedale Galmarini di Tradate, ASST dei SETTE LAGHI, Tradate (VA), 21049, Italy; [andrea.rizzi@asst-settelaghi.it](mailto:andrea.rizzi@asst-settelaghi.it); [lorenzo.conti@asst-settelaghi.it](mailto:lorenzo.conti@asst-settelaghi.it)

<sup>3</sup> Istituti Clinici Scientifici Maugeri IRCCS, Pavia 27100, Italy; [fabio.corsi@icsmaugeri.it](mailto:fabio.corsi@icsmaugeri.it); [carlo.morasso@icsmaugeri.it](mailto:carlo.morasso@icsmaugeri.it)

\* Correspondence: SM, [serena.mazzucchelli@unimi.it](mailto:serena.mazzucchelli@unimi.it); Tel.: +390239044050; ORCID: 0000-0001-6904-8895; CM, [carlo.morasso@icsmaugeri.it](mailto:carlo.morasso@icsmaugeri.it); Tel. + 39 0382 592209 Account Twitter: @MorassoCa ORCID: 0000-0001-9185-0198

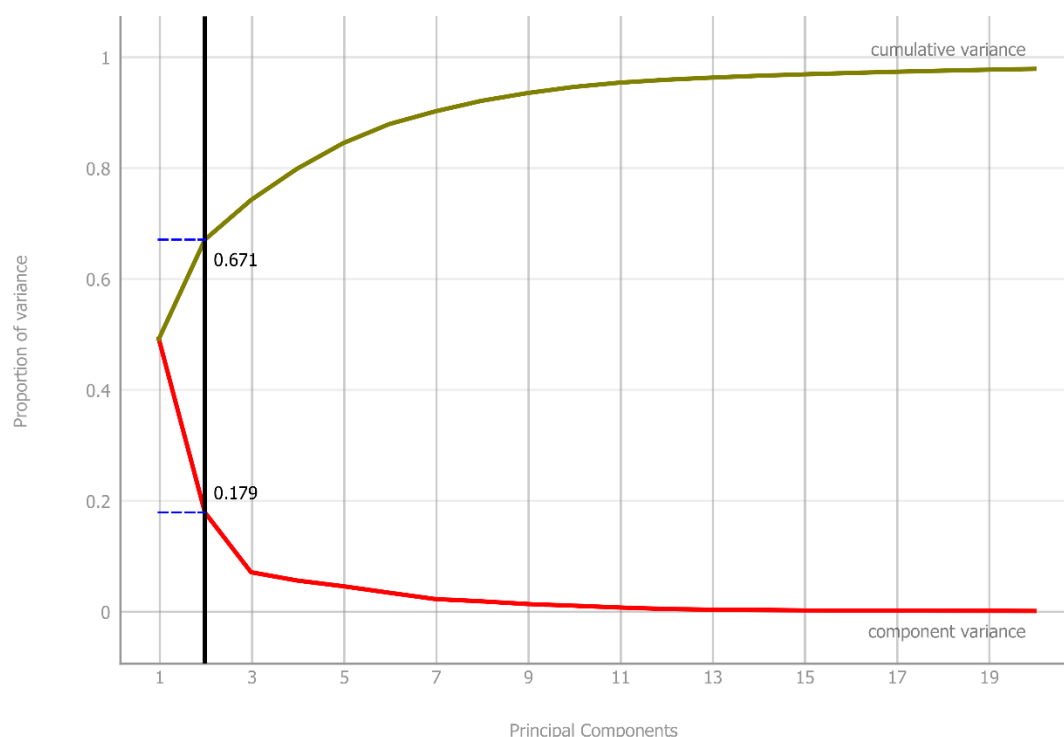

Figure S1. PCA analysis: proportion of variance explained by 2 PCs. The first 2 PCs described 67% of the variability present in our dataset.
